# Supplementary material for: Development of physical, mechanical, antibacterial and cell growth properties of poly(glycerol sebacate urethane) (PGSU) with helping of curcumin and hydroxyapatite nanoparticles
Source: Royal Society of Chemistry journal article supplement (doi:10.1039/d1py01040a), 2021-01-01
Supplement: d1py01040a1.pdf [file d1py01040a1.pdf]

Supplementary information

## **Rehabilitation Physical, Mechanical, Antibacterial and Cell growth Properties of Bio-Rubber Polymers Based on Poly(Glycerol Sebacic acid) with Helping Curcumin and Hydroxyapatite Nanoparticles**

Vafa Fakhri<sup>a</sup>, Aliakbar Jafari<sup>a</sup>, Mir Alireza Shafiei<sup>a</sup>, Mohammad Vahid Ehteshamfar<sup>b</sup>, Shima Khalighian<sup>c</sup>, Hadi Hosseini<sup>d</sup>, Vahabodin Goodarzi<sup>e\*</sup>, Frederik R. Wurm<sup>f\*</sup>, Mehrdad Moosazadeh Moghaddam<sup>e</sup>, and Hossein Ali Khonakdar<sup>g,h</sup>

<sup>a</sup> Department of Polymer Engineering, Amirkabir University of Technology, P.O. Box 15875-4413, Tehran, Iran

<sup>b</sup> Department of Mechanical Engineering, Amirkabir University of Technology, 424 Hafez Avenue, Tehran 15875-4413, Iran

<sup>c</sup> Department of Genetics, Faculty of Advanced Science and Technology, Tehran Medical Sciences, Islamic Azad University, P.O. Box: 19395-1495, Tehran, Iran

<sup>d</sup> Faculty of Engineering & Technology, University of Mazandaran, Babolsar, Iran.

<sup>e</sup> Applied Biotechnology Research Center, Baqiyatallah University of Medical Sciences, P.O.Box 19945-546, Tehran, Iran

<sup>f</sup> Sustainable Polymer Chemistry Group, Department of Molecules and Materials MESA+ Institute for Nanotechnology, Faculty of Science and Technology, Universiteit Twente, Enschede, The Netherlands

<sup>g</sup> Department of Processing, Iran Polymer and Petrochemical Institute, PO Box 14965/115 Tehran, Iran

<sup>h</sup> Reactive processing, Leibniz Institute of Polymer Research Dresden, Hohe Straße 6, Dresden D-01069, Germany

\* Corresponding author

---

**V. Goodarzi**

Applied Biotechnology Research Center, Baqiyatallah University of Medical Sciences, P.O. Box 19945-546, Tehran, Iran

**Email:** [v.goodarzi@hotmail.com](mailto:v.goodarzi@hotmail.com) & [goodarzi@bmsu.ac.ir](mailto:goodarzi@bmsu.ac.ir)

**Frederik R. Wurm**

Sustainable Polymer Chemistry Group, MESA+ Institute for Nanotechnology, Faculty of Science and Technology, Universiteit Twente, Enschede, The Netherlands

**Email:** [f.r.wurm@utwente.nl](mailto:f.r.wurm@utwente.nl)

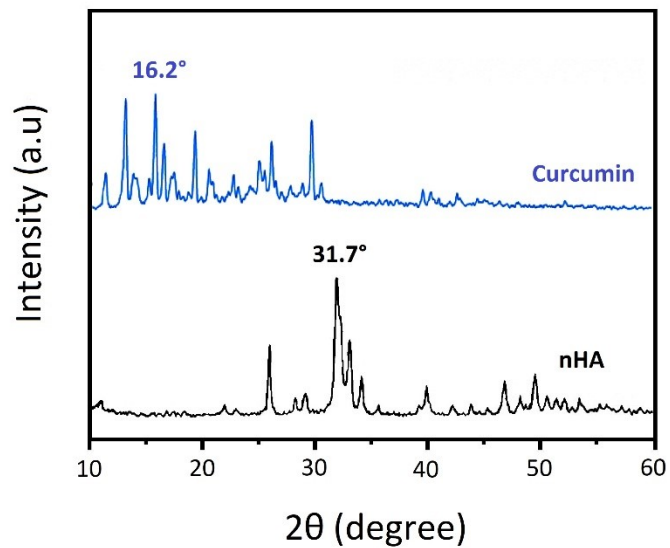

**Figure S1.** X-ray diffraction of curcumin powder and hydroxyapatite nanoparticles.

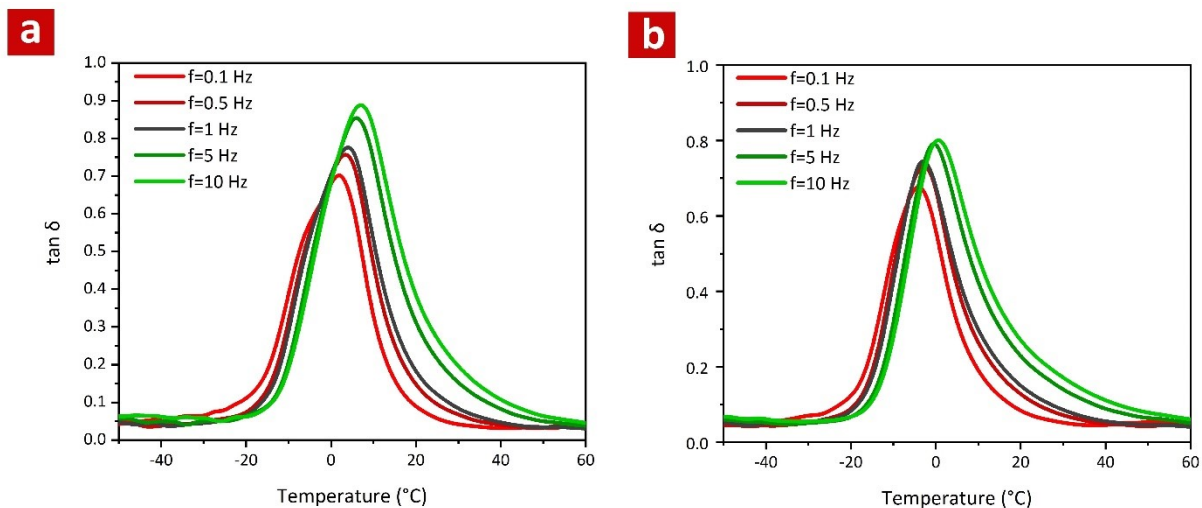

**Figure S2.** Effect of multi frequencies on loss factor (Tan  $\delta$ ) of investigated PGSU-based elastomers: **(a)** PGSU-HA and **(b)** PGSU-Cu

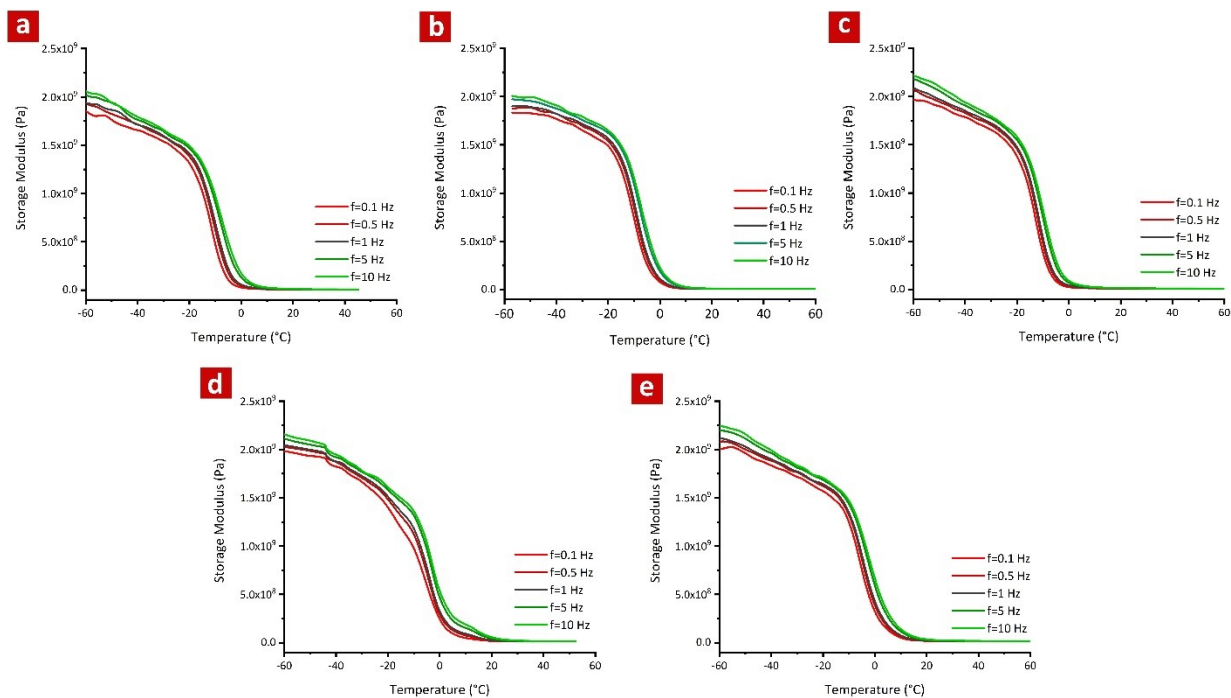

**Figure S3.** Effect of multi frequencies on storage modulus ( $E'$ ) of investigated PGSU-based elastomers: (a) PGSU, (b) PGSU-HA, (c) PGSU-Cu, (d) PGSU-HA-Cu5 and (e) PGSU-HA-Cu3

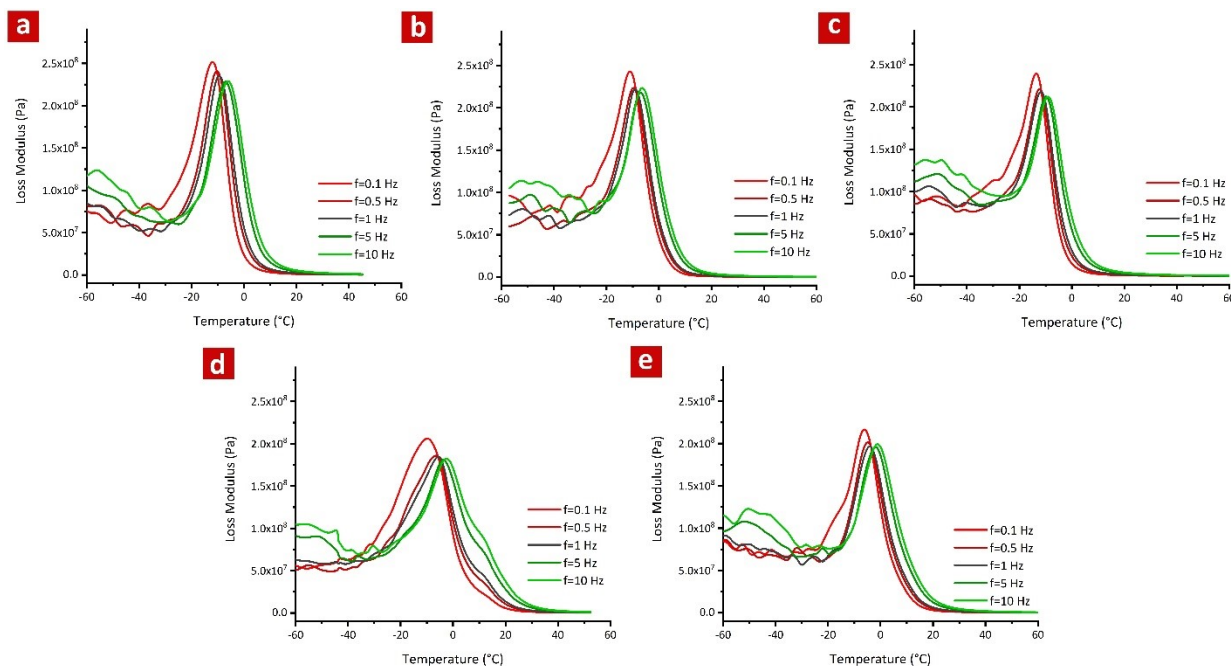

**Figure S4.** Effect of multi frequencies on loss modulus ( $E''$ ) of investigated PGSU-based elastomers: (a) PGSU, (b) PGSU-HA, (c) PGSU-Cu, (d) PGSU-HA-Cu5 and (e) PGSU-HA-Cu3

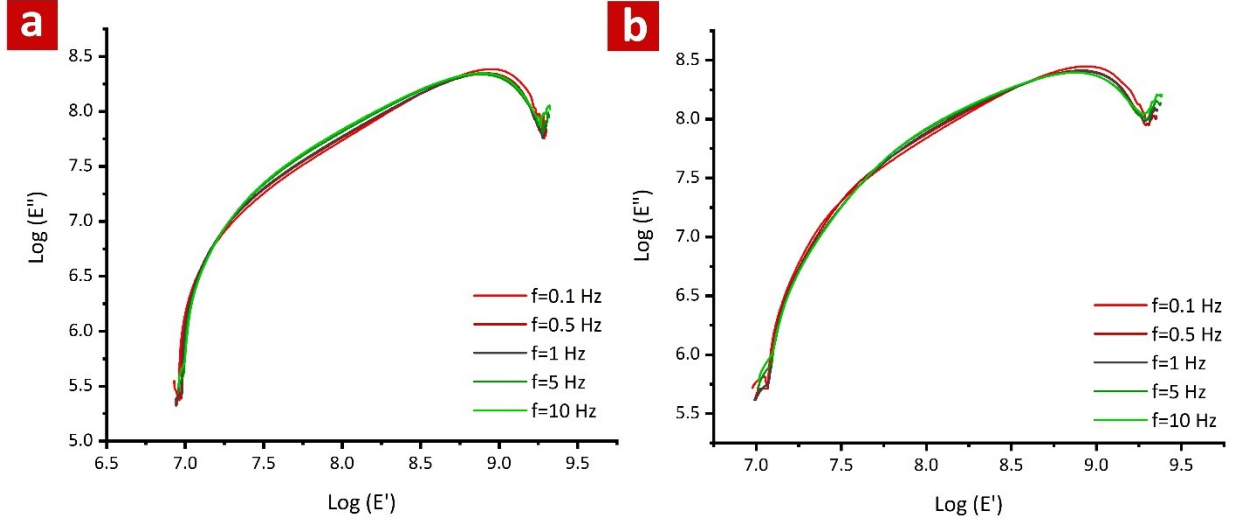

**Figure S5.** Cole-Cole plots at various frequencies: **(a)** PGSU-HA and **(b)** PGSU-Cu.

### 1. Generating Master curves

For storage modulus, TTS principle can be expressed by the equation S1:

$$E'(f a_T, T_r) = E'(f, T) \quad (S1)$$

Where  $a_T$ ,  $f$  and  $T_r$  are the horizontal shift factor, frequency and the reference temperature, respectively.

In the temperature range of  $T_g$  to  $T_g+100$  °C, the shift factor ( $a_T$ ) can be calculated by the Williams-Landel-Ferry (WLF) equation expressed as:<sup>1</sup>

$$\text{Log}(a_t) = \frac{-C_1(T - T_0)}{C_2 + (T - T_0)} \quad (S2)$$

Where  $T_0$  is the reference temperature and  $C_1$  and  $C_2$  are WLF constants. If  $T_g$  is taken as  $T_0$ , the  $C_1$  and  $C_2$  are equal to 17.4 and 51.6, respectively. For other reference temperatures the WLF constants ( $C_1^0$  and  $C_2^0$ ) can be calculated by the following equations:<sup>1</sup>

$$C_1^0 = \frac{C_1^g C_2^g}{C_1^g + T_0 - T_g} \quad (S3)$$

$$C_2^0 = C_2^g + T_0 - T_g \quad (S4)$$

Where  $C_1^g$  and  $C_2^g$  are WLF constant at  $T_g$ .

**Table S1.** WLF constants and calculated  $\log(a_T)$  for all samples at a reference temperature of 37°C.

| Sample          | $T_g$<br>(°C) | WLF<br>Constant<br>( $C_1$ ) | WLF<br>Constant<br>( $C_2$ ) | $\log(a_T)$ |       |        |        |        |        |        |        |        |        |
|-----------------|---------------|------------------------------|------------------------------|-------------|-------|--------|--------|--------|--------|--------|--------|--------|--------|
|                 |               |                              |                              | 0(°C)       | 5(°C) | 10(°C) | 15(°C) | 20(°C) | 25(°C) | 30(°C) | 35(°C) | 45(°C) | 55(°C) |
| PGSU            | -9.5          | 14.0742                      | 98.1                         | 8.523       | 6.814 | 5.345  | 4.069  | 2.950  | 1.962  | 1.081  | 0.293  | -1.061 | -2.182 |
| PGSU-HA         | -9            | 14.1851                      | 97.6                         | 8.661       | 6.920 | 5.425  | 4.128  | 2.992  | 1.989  | 1.096  | 0.297  | -1.075 | -2.209 |
| PGSU-Cu         | -11.5         | 13.6473                      | 100.1                        | 8.002       | 6.413 | 5.041  | 3.844  | 2.792  | 1.859  | 1.026  | 0.278  | -1.010 | -2.080 |
| PGSU-<br>HA-Cu5 | -5.5          | 15.0134                      | 94.1                         | 9.728       | 7.736 | 6.041  | 4.581  | 3.310  | 2.194  | 1.207  | 0.326  | -1.176 | -2.411 |
| PGSU-<br>HA-Cu3 | -4            | 15.3988                      | 92.6                         | 10.247      | 8.131 | 6.338  | 4.798  | 3.463  | 2.293  | 1.259  | 0.340  | -1.225 | -2.506 |

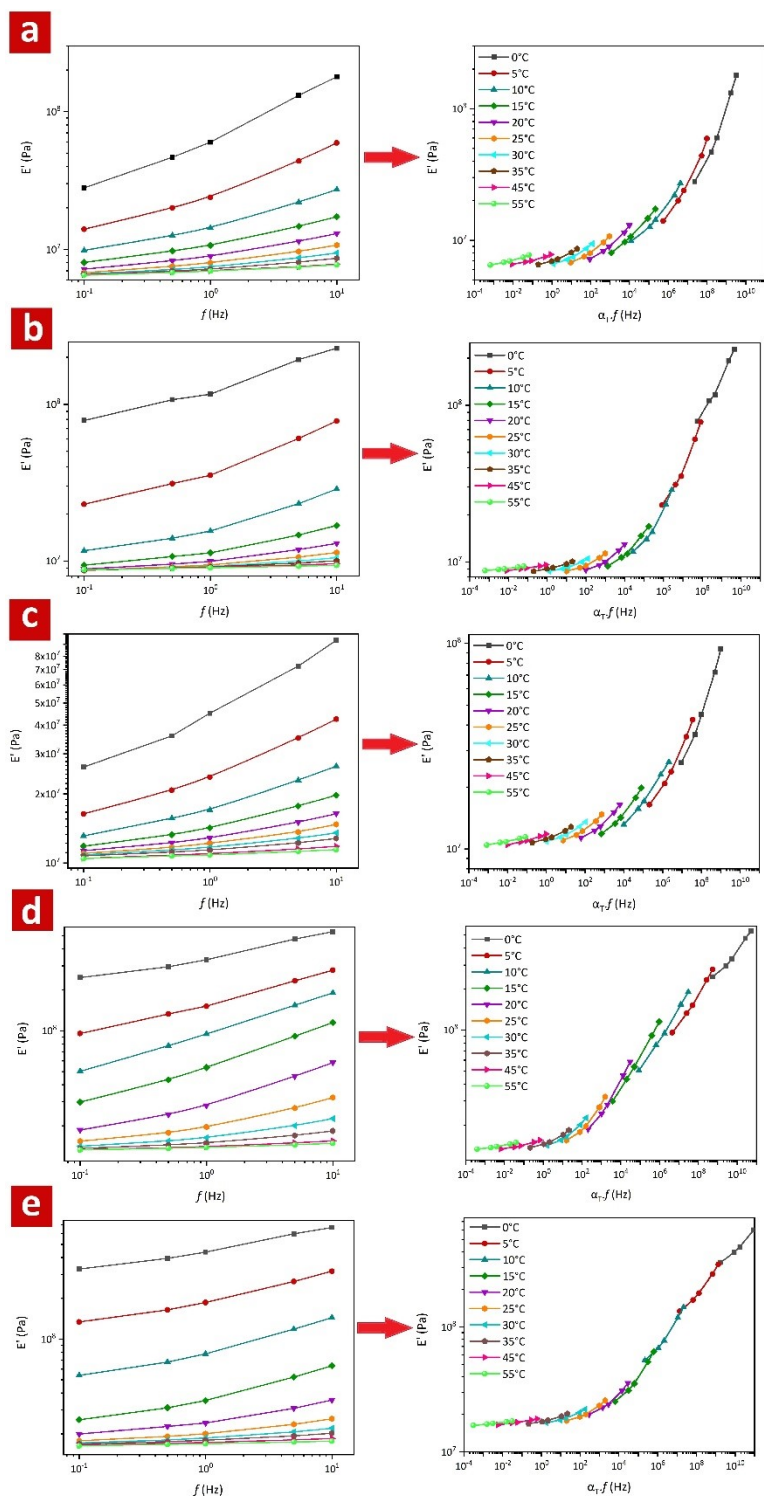

**Figure S6.** Frequency sweep data versus storage modulus and transferred plot of storage modulus of (a) PGSU, (b) PGSU-HA, (c) PGSU-Cu, (d) PGSU-HA-Cu5, and (e) PGSU-HA-Cu3 at a reference temperature of 37°C.

## 2. Calculating surface tension

Wetting phenomena on a macroscopic scale can be shown by Young's equation.<sup>2</sup>

$$\gamma_{lv} \cos \theta = \gamma_{sv} - \gamma_{sl} \quad (S5)$$

Where  $\theta$  is the contact angle,  $\gamma_{sl}$  is solid-liquid interfacial free energy,  $\gamma_{lv}$  is liquid surface tension and  $\gamma_{sv}$  is solid surface free energy.

The solid surface free energy of an unknown material can be calculated through Owens-Wendt method:<sup>2,3</sup>

$$\gamma_{sl} = \gamma_{sv} + \gamma_{lv} - 2(\sqrt{\gamma_{sv}^D \gamma_{lv}^D} + \sqrt{\gamma_{sv}^P \gamma_{lv}^P}) \quad (S6)$$

Where  $\gamma_{sv}^D$  and  $\gamma_{lv}^D$  are dispersive portions and  $\gamma_{sv}^P$  and  $\gamma_{lv}^P$  are polar portions of solid and liquid surface energies, respectively. By combining Eq.S5 and Eq.S6:

$$\sqrt{\gamma_{sv}^D \gamma_{lv}^D} + \sqrt{\gamma_{sv}^P \gamma_{lv}^P} = 0.5[\gamma_{lv}(1 + \cos \theta)] \quad (S7)$$

The solid surface free energy of an unknown material can also be calculated through Wu- harmonic-mean equation:<sup>3</sup>

$$\gamma_{sl} = \gamma_{sv} + \gamma_{lv} - 4\left(\frac{\gamma_{sv}^d \gamma_{lv}^d}{\gamma_{sv}^d + \gamma_{lv}^d} + \frac{\gamma_{sv}^p \gamma_{lv}^p}{\gamma_{sv}^p + \gamma_{lv}^p}\right) \quad (S8)$$

By combining Eq.S8 and Eq.S5:

$$\frac{\gamma_{sv}^d \gamma_{lv}^d}{\gamma_{sv}^d + \gamma_{lv}^d} + \frac{\gamma_{sv}^p \gamma_{lv}^p}{\gamma_{sv}^p + \gamma_{lv}^p} = 0.25[\gamma_{lv}(1 + \cos \theta)] \quad (S9)$$



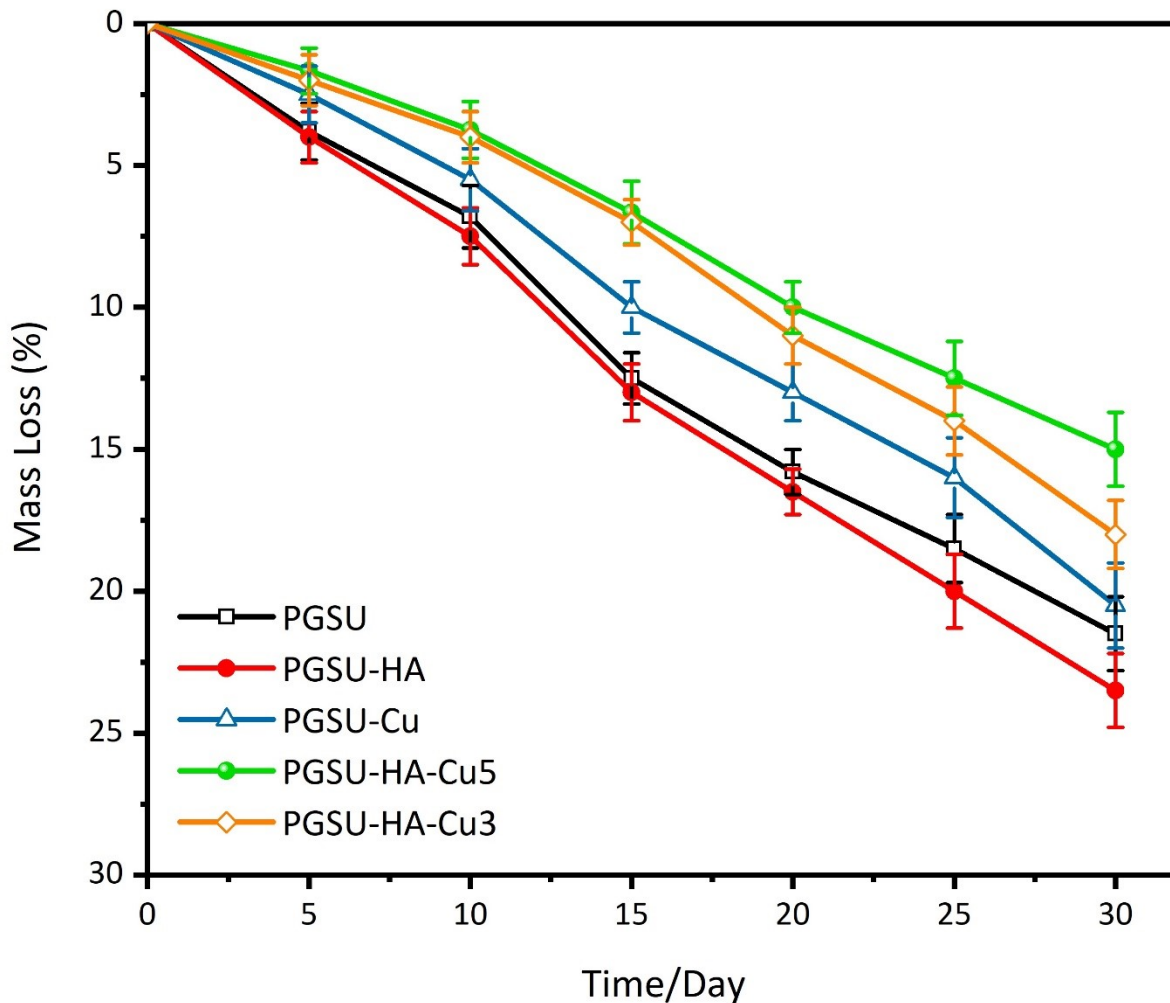

**Figure S7.** *In-vitro* enzymatic degradations profile of the bioelastomers in PBS solution (pH=7.4) at 37 °C

#### References:

1. Landel RF, Nielsen LE. *Mechanical Properties of Polymers and Composites*. CRC Press; 1993. doi:10.1201/b16929
2. Annamalai M, Gopinadhan K, Han SA, et al. Surface energy and wettability of van der Waals structures. *Nanoscale*. 2016;8(10):5764-5770. doi:10.1039/C5NR06705G
3. Fakhri V, Monem M, Mir Mohamad Sadeghi G, Khonakdar HA, Goodarzi V, Karimpour-Motlagh N. Impact of poly( $\epsilon$ -caprolactone) on the thermal, dynamic-mechanical and crystallization behavior of polyvinylidene fluoride/poly( $\epsilon$ -caprolactone) blends in the presence of KIT-6 mesoporous

particles. *Polym Adv Technol.* 2021;n/a(n/a). doi:<https://doi.org/10.1002/pat.5444>
